# Supplementary material for: XENOFOOD - An Autoclaved Feed Supplement Containing Autoclavable Antimicrobial Peptides - Exerts Anticoccidial GI Activity, and Causes Bursa Enlargement, But Has No Detectable Harmful Effects In Broiler Cockerels Despite <em>In Vitro</em> Cytotoxic Ingredients
Source: Preprints.org preprint supplement (doi:10.20944/preprints202301.0489.v1), 2023-01-27
Supplement: Supplementary file 1 [file supplementary]

**Table 1S**. The scoring system published by Amin et al. (2012) ˙[44]was applied to assess the degree of LMH monolayer destruction.

|  |  |  | SCORES | | | | |
| --- | --- | --- | --- | --- | --- | --- | --- |
| Score | | 0 | | 1 | 2 | 3 | 4 |
| 0 | intact monolayer | 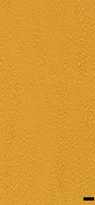 | | 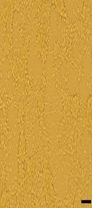 | 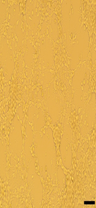 | 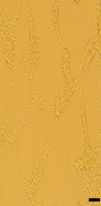 | 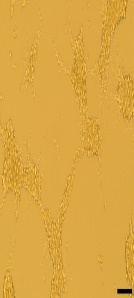 |
| 1 | up to 25%  of the monolayer destructed |
| 2 | 25-50%  of the monolayer destructed |
| 3 | 50-75%  of the monolayer destructed |
| 4 | more than 75%  of the monolayer destructed |

1 Scoring system for the degree of LMH monolayer destruction Abbreviaaitions: EPB= entomopathogenic bacteria with anticrobial and cytopathogenic potential.

Supplementary Material to Results 2.2.2. The Second Experiment See details in the article. Score:

| 0 | an intact monolayer of LMH cells |  |  |
| --- | --- | --- | --- |
| 1 | up to 25% of the monolayer destructed | | |
| 2 | 25-50% of the monolayer destructed | |  |
| 3 | 50-75% of the monolayer destructed | |  |
|  | more than 75% of the monolayer destructed | | |

**Table S1.** Stocks solutions and dilutions, and dilutions of EMA and EMC CFCMs.

| **Dilutions** | **EMA 80%** | **EMC 60%** |
| --- | --- | --- |
| 1:2.5 | 32% | 24% |
| 1:5 | 16% | 12% |
| 1:7.5 | 10.63% | 7.97% |
| 1:10 | 8% | 6% |
| 1:25 | 3.2% | 2.4% |
| 1:50 | 1.6% | 1.2% |
| 1:75 | 1.063% | 0.797% |
| 1:100 | 0.8% | 0.6% |

**Table S2.** Results (Scores) of Experiment 2.

| **Sample** |  |  | **24 h** | **48 h** | **72 h** | **96 h** |
| --- | --- | --- | --- | --- | --- | --- |
| Original (unchanged) media in which the cell layer had developed  RPMI1640+10%FKS+0,5% AB | | A | 0 | 0 | 0 | 0 |
| B | 0 | 0 | 0 | 0 |
| Fresh media (original media replaced by fresh RPMI1640+10%FKS+0,5% AB) | | A | 0 | 0 | 0 | 0 |
| B | 0 | 0 | 0 | 0 |
| Original media replaced by EMA 80% 1:2.5 | | A | 4 | 4 | 4 | 4 |
| B | 4 | 4 | 4 | 4 |
| EMA 80% 1:5 | | A | 3 | 4 | 4 | 4 |
| B | 3 | 3 | 4 | 4 |
| EMA 80% 1:7.5 | | A | 2 | 2 | 4 | 4 |
| B | 2 | 2 | 3 | 3 |
| EMA 80% 1:10 | | A | 1 | 2 | 2 | 2 |
| B | 1 | 2 | 2 | 2 |
| EMA 80% 1:25 | | A | 1 | 1 | 0 | 0 |
| B | 1 | 1 | 0 | 0 |
| EMA 80% 1:50 | | A | 1 | 1 | 0 | 0 |
| B | 1 | 1 | 1 | 1 |
| EMA 80% 1:75 | | A | 1 | 1 | 0 | 0 |
| B | 1 | 1 | 1 | 0 |
| EMA 80% 1:100 | | A | 1 | 1 | 0 | 0 |
| B | 1 | 1 | 1 | 0 |
| EMC 60% 1:2.5 | | A | 2 | 3 | 4 | 4 |
| B | 2 | 3 | 4 | 4 |
| EMC 60% 1:5 | | A | 1 | 1 | 2 | 2 |
| B | 1 | 1 | 2 | 2 |
| EMC 60% 1:7.5 | | A | 1 | 1 | 2 | 2 |
| B | 1 | 1 | 2 | 2 |
| EMC 60% 1:10 | | A | 1 | 1 | 2 | 2 |
| B | 1 | 1 | 2 | 2 |
| EMC 60% 1:25 | | A | 1 | 1 | 0 | 0 |
| B | 1 | 1 | 0 | 0 |
| EMC 60% 1:50 | | A | 1 | 1 | 0 | 0 |
| B | 1 | 1 | 1 | 0 |
| EMC 60% 1:75 | | A | 1 | 1 | 0 | 0 |
| B | 1 | 1 | 0 | 0 |
| EMC 60% 1:100 | | A | 0 | 0 | 0 | 0 |
| B | 0 | 0 | 0 | 0 |
|  |  |  |  |  |  |  |
